# Supplementary material for: Nine Mitochondrial Genomes of Phasmatodea with Two Novel Mitochondrial Gene Rearrangements and Phylogeny
Source: MDPI journal article supplement (doi:10.3390/insects14050485), 2023-05-22
Supplement: s1 [file s1]

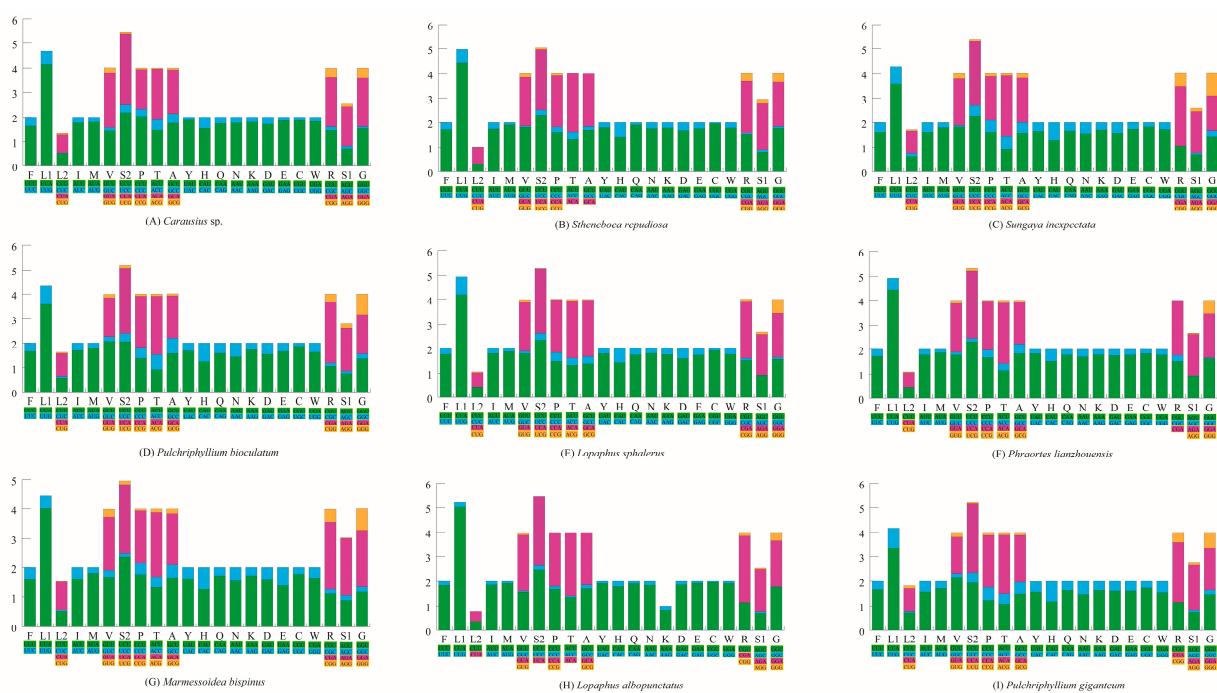

**Figure S2.** Nine histograms of the relative synonymous codon usage (RSCU) in newly sequenced mitogenomes. The X-axis shows synonymous codons, and the Y-axis shows RSCU values.

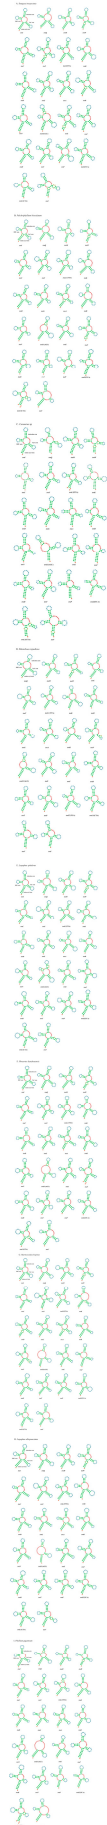

**Figure S3.** The secondary structure of tRNAs in nine newly sequenced mitogenomes.
