# Supplementary material for: Nine Mitochondrial Genomes of Phasmatodea with Two Novel Mitochondrial Gene Rearrangements and Phylogeny
Source: MDPI journal article supplement (doi:10.3390/insects14050485), 2023-05-22
Supplement: s1 [file s1]

Table S7. Amino acid use frequencies of proteins in the newly sequenced mitogenomes.

| species  | <i>Sungaya<br/>inexpectata</i> |       | <i>Pulchriphylliu<br/>m bioculatum</i> |       | <i>Pulchriphylliu<br/>m giganteum</i> |       | <i>Carausius</i> sp. |       | <i>Sitheneboea<br/>repudiosa</i> |       | <i>Lopaphus<br/>sphalerus</i> |       | <i>Phraortes<br/>lianzhouensis</i> |       | <i>Marmessoidea<br/>bispinus</i> |       | <i>Lopaphus<br/>albopunctatus</i> |       |
|----------|--------------------------------|-------|----------------------------------------|-------|---------------------------------------|-------|----------------------|-------|----------------------------------|-------|-------------------------------|-------|------------------------------------|-------|----------------------------------|-------|-----------------------------------|-------|
| AA       | Count                          | %     | Count                                  | %     | Count                                 | %     | Count                | %     | Count                            | %     | Count                         | %     | Count                              | %     | Count                            | %     | Count                             | %     |
| Phe(F)   | 363                            | 9.86  | 360                                    | 9.79  | 369                                   | 10.02 | 311                  | 8.49  | 346                              | 9.4   | 370                           | 10    | 347                                | 9.42  | 330                              | 8.96  | 348                               | 9.42  |
| Leu2(L2) | 323                            | 8.77  | 326                                    | 8.87  | 327                                   | 8.88  | 383                  | 10.46 | 402                              | 10.93 | 373                           | 10.08 | 385                                | 10.46 | 363                              | 9.85  | 424                               | 11.47 |
| Leu1(L1) | 130                            | 3.53  | 122                                    | 3.32  | 144                                   | 3.91  | 108                  | 2.95  | 83                               | 2.26  | 80                            | 2.16  | 85                                 | 2.31  | 125                              | 3.39  | 62                                | 1.68  |
| Ile(I)   | 355                            | 9.64  | 354                                    | 9.63  | 324                                   | 8.8   | 387                  | 10.57 | 393                              | 10.68 | 368                           | 9.95  | 379                                | 10.29 | 349                              | 9.47  | 378                               | 10.23 |
| Met(M)   | 371                            | 10.07 | 401                                    | 10.91 | 393                                   | 10.68 | 400                  | 10.92 | 393                              | 10.68 | 423                           | 11.44 | 376                                | 10.21 | 396                              | 10.75 | 403                               | 10.91 |
| Val(V)   | 191                            | 5.19  | 167                                    | 4.54  | 189                                   | 5.13  | 156                  | 4.26  | 155                              | 4.21  | 156                           | 4.22  | 182                                | 4.94  | 182                              | 4.94  | 156                               | 4.22  |
| Ser2(S2) | 225                            | 6.11  | 233                                    | 6.34  | 237                                   | 6.44  | 223                  | 6.09  | 218                              | 5.93  | 228                           | 6.16  | 223                                | 6.06  | 212                              | 5.75  | 221                               | 5.98  |
| Pro(P)   | 132                            | 3.58  | 134                                    | 3.65  | 132                                   | 3.59  | 132                  | 3.6   | 130                              | 3.53  | 131                           | 3.54  | 136                                | 3.69  | 129                              | 3.5   | 133                               | 3.6   |
| Thr(T)   | 228                            | 6.19  | 214                                    | 5.82  | 214                                   | 5.81  | 191                  | 5.22  | 205                              | 5.57  | 194                           | 5.24  | 186                                | 5.05  | 200                              | 5.43  | 191                               | 5.17  |
| Ala(A)   | 114                            | 3.1   | 99                                     | 2.69  | 102                                   | 2.77  | 112                  | 3.06  | 104                              | 2.83  | 116                           | 3.14  | 116                                | 3.15  | 127                              | 3.45  | 108                               | 2.92  |
| Tyr(Y)   | 171                            | 4.64  | 176                                    | 4.79  | 160                                   | 4.35  | 179                  | 4.89  | 173                              | 4.7   | 167                           | 4.51  | 180                                | 4.89  | 184                              | 4.99  | 179                               | 4.84  |
| His(H)   | 66                             | 1.79  | 63                                     | 1.71  | 62                                    | 1.68  | 69                   | 1.88  | 62                               | 1.69  | 65                            | 1.76  | 65                                 | 1.77  | 69                               | 1.87  | 66                                | 1.79  |
| Gln(Q)   | 65                             | 1.76  | 63                                     | 1.71  | 67                                    | 1.82  | 61                   | 1.67  | 61                               | 1.66  | 64                            | 1.73  | 64                                 | 1.74  | 59                               | 1.6   | 60                                | 1.62  |
| Asn(N)   | 187                            | 5.08  | 190                                    | 5.17  | 187                                   | 5.08  | 199                  | 5.43  | 198                              | 5.38  | 212                           | 5.73  | 185                                | 5.02  | 181                              | 4.91  | 212                               | 5.74  |
| Lys(K)   | 101                            | 2.74  | 120                                    | 3.26  | 117                                   | 3.18  | 116                  | 3.17  | 110                              | 2.99  | 108                           | 2.92  | 121                                | 3.29  | 113                              | 3.07  | 114                               | 3.09  |
| Asp(D)   | 70                             | 1.9   | 66                                     | 1.8   | 67                                    | 1.82  | 76                   | 2.08  | 72                               | 1.96  | 67                            | 1.81  | 74                                 | 2.01  | 73                               | 1.98  | 72                                | 1.95  |
| Glu(E)   | 80                             | 2.17  | 70                                     | 1.9   | 71                                    | 1.93  | 67                   | 1.83  | 73                               | 1.98  | 77                            | 2.08  | 74                                 | 2.01  | 77                               | 2.09  | 78                                | 2.11  |
| Cys(C)   | 44                             | 1.19  | 57                                     | 1.55  | 52                                    | 1.41  | 42                   | 1.15  | 42                               | 1.14  | 45                            | 1.22  | 48                                 | 1.3   | 46                               | 1.25  | 43                                | 1.16  |
| Trp(W)   | 96                             | 2.61  | 92                                     | 2.5   | 92                                    | 2.5   | 98                   | 2.68  | 91                               | 2.47  | 94                            | 2.54  | 93                                 | 2.53  | 95                               | 2.58  | 94                                | 2.54  |
| Arg(R)   | 53                             | 1.44  | 49                                     | 1.33  | 49                                    | 1.33  | 52                   | 1.42  | 51                               | 1.39  | 52                            | 1.41  | 52                                 | 1.41  | 53                               | 1.44  | 53                                | 1.43  |
| Ser1(S1) | 109                            | 2.96  | 126                                    | 3.43  | 125                                   | 3.4   | 104                  | 2.84  | 128                              | 3.48  | 116                           | 3.14  | 111                                | 3.01  | 130                              | 3.53  | 102                               | 2.76  |
| Gly(G)   | 209                            | 5.67  | 194                                    | 5.28  | 201                                   | 5.46  | 196                  | 5.35  | 189                              | 5.14  | 193                           | 5.22  | 200                                | 5.43  | 192                              | 5.21  | 198                               | 5.36  |
