# Supplementary material for: Nine Mitochondrial Genomes of Phasmatodea with Two Novel Mitochondrial Gene Rearrangements and Phylogeny
Source: MDPI journal article supplement (doi:10.3390/insects14050485), 2023-05-22
Supplement: s1 [file s1]

(a) Results of first codon saturation detection.

IssAsym is Iss.c assuming an asymmetrical topology.

Note: two-tailed t-tests are used.

No

|             |                   |                             |
|-------------|-------------------|-----------------------------|
| Iss < Iss.c | Little saturation | Substantial saturation      |
| Iss > Iss.c | Useless sequences | Very poor for phylogenetics |

IssAsym is Iss.c assuming an asymmetrical topology.

Note: two-tailed t-tests are used.

No

|             |                   |                             |
|-------------|-------------------|-----------------------------|
| Iss < Iss.c | Little saturation | Substantial saturation      |
| Iss > Iss.c | Useless sequences | Very poor for phylogenetics |

IssAsym is Iss.c assuming an asymmetrical topology.

Note: two-tailed t-tests are used.

No

|             |                   |                             |
|-------------|-------------------|-----------------------------|
| Iss < Iss.c | Little saturation | Substantial saturation      |
| Iss > Iss.c | Useless sequences | Very poor for phylogenetics |
