# Supplementary material for: Nine Mitochondrial Genomes of Phasmatodea with Two Novel Mitochondrial Gene Rearrangements and Phylogeny
Source: MDPI journal article supplement (doi:10.3390/insects14050485), 2023-05-22
Supplement: s1 [file s1]

Table S1. Information on the 58 species used for phylogenetic analysis.

| Family           | Subfamily        | Species                                                | Length    | Accession no. | Reference   |
|------------------|------------------|--------------------------------------------------------|-----------|---------------|-------------|
| Aschiphasmatidae | Aschiphasmatinae | <i>Nanhuaphasma hamicercum</i> Chen & He, 2002         | 14,921bp  | MZ312646      | [34]        |
|                  |                  | <i>Orthomeria smaragdinum</i> Redtenbacher, 1906       | 15,895 bp | MZ31264       | [34]        |
| Bacillidae       | Bacillinae       | <i>Bacillus rossius</i> Rossi, 1790                    | 14,152bp  | GU001956      | [72]        |
|                  |                  | <i>Bacillus atticus</i> Brunner von Wattenwyl, 1882    | 14,141bp  | GU001955      | [72]        |
| Heteropterygidae | Dataminae        | <i>Orestes mouhotii</i> Bates, 1865                    | 16,223 bp | AB477462      | [39]        |
|                  |                  | <i>Orestes guangxiensis</i> Bi & Li, 1994              | 16,869 bp | MW450873      | [45]        |
|                  | Obriminae        | <i>Aretaon asperrimus</i> Redtenbacher, 1906           |           | SRR1172270    | [52]        |
|                  |                  | <i>Sungaya inexpectata</i> Zompro, 1996                | 17,368 bp | OQ682523      | This study  |
|                  | Heteropteryginae | <i>Heteropteryx dilatata</i> Parkinson, 1798           | 16,618 bp | AB477468      | [39]        |
|                  |                  |                                                        |           |               |             |
| Lonchodidae      | Lonchodinae      | <i>Phraortes illepidus</i> Brunner von Wattenwyl, 1907 | 16,456 bp | AB477460      | [39]        |
|                  |                  | <i>Megalophasma granulatum</i> Bi, 1995                | 15,275 bp | KY124331      | [32]        |
|                  |                  | <i>Phraortes</i> sp. Miyako Island                     | 14,913 bp | AB477465      | [39]        |
|                  |                  | <i>Phraortes</i> sp. Iriomote Island                   | 16,867 bp | AB477464      | [39]        |
|                  |                  | <i>Eurycantha calcarata</i> Lucas, 1869                | 16,280 bp | MW915467      | [54]        |
|                  |                  | <i>Carasisus morosus</i> Brunner von Wattenwyl, 1907   |           | SRR3211828    | [52]        |
|                  |                  | <i>Carausius</i> sp.                                   | 16,198 bp | OQ682524      | This study  |
|                  |                  | <i>Stheneboea repudiosa</i>                            | 16,376 bp | OQ682531      | This study  |
|                  |                  | Brunner von Wattenwyl, 1907                            |           |               |             |
|                  |                  | <i>Phraortes lianzhouensis</i> Chen & He, 2008         | 16,690 bp | OQ682528      | This study  |
|                  | Necrosciinae     | <i>Micadina phluctainoides</i> Rehn, 1904              | 16,507 bp | AB477466      | [39]        |
|                  |                  | <i>Sipyloidea sipylus</i> Westwood, 1859               | 17,001 bp | AB477470      | [39]        |
|                  |                  | <i>Calvisia medogensis</i> Bi, 1993                    | 16,107 bp | KY124330      | [32]        |
|                  |                  | <i>Neohirasea japonica</i> Haan, 1842                  | 15,305 bp | AB477469      | [39]        |
|                  |                  | <i>Micadina brachyptera</i> Liu & Cai, 1994            | 15,879 bp | MT025192      | [33]        |
|                  |                  | <i>Neohirasea stephanus</i> Redtenbacher, 1908         | 18,021 bp | OL405132      | Unpublished |
|                  |                  | <i>Lopaphus albopunctatus</i> Chen & He, 2004          | 15,011 bp | OQ682525      | This study  |
|                  |                  | <i>Marmessoidea bispinus</i> Burmeister, 1838          | 16,630 bp | OQ682527      | This study  |
|                  |                  | <i>Lopaphus sphalerus</i> Redtenbacher, 1908           | 17,761 bp | OQ682526      | This study  |
|                  |                  |                                                        |           |               |             |
|                  |                  |                                                        |           |               |             |
|                  |                  |                                                        |           |               |             |
|                  |                  |                                                        |           |               |             |
| Phasmatidae      | Megacraniinae    | <i>Megacrania alpheus adan</i> Yamasaki, 1991          | 17,124 bp | AB477471      | [39]        |
|                  | Extatosomatinae  | <i>Extatosoma tiaratum</i> Macleay, 1826               | 16,537 bp | AB642680      | [53]        |
|                  | Phasmatinae      | <i>Acanthoxyla</i> sp.                                 |           | SRR2089887    | [52]        |
|                  |                  | <i>Clitarchus hookeri</i> White, 1846                  |           | SRR3080266    | [52]        |
|                  |                  | <i>Argosarchus horridus</i> White, 1846                |           | SRR2089902    | [52]        |
|                  | Clitumninae      | <i>Entoria okinawaensis</i> Shiraki, 1935              | 16,910 bp | AB477459      | [39]        |
|                  |                  |                                                        |           |               |             |

|                   |                   |                                                                                    |           |            |             |
|-------------------|-------------------|------------------------------------------------------------------------------------|-----------|------------|-------------|
|                   |                   | <i>Phobaeticus serratipes</i> Gray, 1835                                           | 16,182 bp | AB477467   | [39]        |
|                   |                   | <i>Ramulus hainanense</i> Chen & He, 2002                                          | 15,590 bp | FJ156750   | Unpublished |
|                   |                   | <i>Ramulus irregulariterdentatus</i><br>Brunner von Wattenwyl, 1907                | 16,633 bp | AB477463   | [39]        |
|                   |                   | <i>Rumulus artemis</i> Westwood, 1859                                              |           | SRR1172422 | [52]        |
|                   |                   | <i>Medauroidea extradentata</i><br>Brunner von Wattenwyl, 1907                     |           | SRR1172394 | [52]        |
|                   |                   | <i>Phryganistria guangxiensis</i> Chen & He, 2008                                  | 17,005bp  | MW450875   | [45]        |
|                   |                   | <i>Pharnaciini</i> sp. NS-2020 Günther, 1953                                       | 15,192 bp | MT025193   | [33]        |
|                   | Pachymorphinae    | <i>Niveaphasma anulata</i> Hutton, 1898                                            |           | SRR2089878 | [52]        |
|                   |                   | <i>Tectarchus obovatus</i> Salmon, 1954                                            |           | SRR2089893 | [52]        |
|                   |                   | <i>Tectarchus salebrosus</i> Hutton, 1899                                          |           | SRR2089908 | [52]        |
|                   |                   | <i>Asteliaphasma jucundum</i> Salmon, 1991                                         |           | SRR2089913 | [52]        |
|                   |                   | <i>Spinotectarchus acornutus</i> Hutton, 1899                                      |           | SRR2089897 | [52]        |
|                   |                   | <i>Micrarchus hystriculus</i> Westwood, 1859                                       |           | SRR1054191 | [52]        |
|                   |                   | <i>Micrarchus</i> sp.                                                              |           | SRR1054193 | [52]        |
| Phylliidae        | Phylliinae        | <i>Cryptophyllum tibetense</i> Liu, 1993                                           | 18,248 bp | KX091862   | Unpublished |
|                   |                   | <i>Cryptophyllum westwoodii</i> Wood-Mason, 1875                                   | 17,222 bp | MW229063   | Unpublished |
|                   |                   | <i>Pulchriphyllum bioculatum</i> Gray, 1832                                        | 16,686 bp | OQ682529   | This study  |
|                   |                   | <i>Pulchriphyllum giganteum</i> Hausleithner, 1984                                 | 16,868 bp | OQ682530   | This study  |
|                   |                   | <i>Pulchriphyllum giganteum</i> Hausleithner, 1984                                 | 13,980 bp | AB477461   | [39]        |
|                   |                   | <i>Phyllum siccifolium</i> Linnaeus, 1758                                          |           | ERR392012  | [52]        |
| Pseudophasmatidae | Pseudophasmatinae | <i>Peruphasma schultei</i> Conle & Hennemann, 2005                                 | 15,896bp  | MW450874   | [45]        |
|                   |                   | <i>Peruphasma schultei</i> Conle & Hennemann, 2005                                 |           | SRR1002984 | [52]        |
| Timematidae       | Timematinae       | <i>Timema californicum</i> Scudder, 1895                                           | 14,387 bp | DQ241799   | [73]        |
| Mantophasmatidae  | Mantophasmatinae  | <i>Sclerophasma paresisense</i><br>Klass, Picker, Damgaard, van Noort & Tojo, 2003 | 15,500 bp | DQ241798   | [73]        |
| Grylloblattidae   |                   | <i>Grylloblatta sculleni</i> Gurney, 1937                                          | 15,595 bp | DQ241796   | [73]        |
