# Supplementary material for: Nine Mitochondrial Genomes of Phasmatodea with Two Novel Mitochondrial Gene Rearrangements and Phylogeny
Source: MDPI journal article supplement (doi:10.3390/insects14050485), 2023-05-22
Supplement: s1 [file s1]

Table S4. Base composition of the newly sequenced mitogenomes.

| Family           | Genera                 | Species                           | Region     | Whole genome | PCGs   |        | tRNA   |        | rRNA   | Control Region |
|------------------|------------------------|-----------------------------------|------------|--------------|--------|--------|--------|--------|--------|----------------|
|                  |                        |                                   | Strand     | +            | +      | -      | +      | -      | -      | +              |
| Heteropterygidae | <i>Obrimini</i>        | <i>Sungaya inexpectata</i>        | Length(bp) | 17,368       | 6,804  | 4,308  | 928    | 533    | 2083   | 2728           |
|                  |                        |                                   | A+T%       | 74.3         | 72     | 76.3   | 77.8   | 73.3   | 76.6   | 74.6           |
|                  |                        |                                   | AT-Skew    | 0.235        | 0.123  | -0.418 | 0.118  | -0.151 | -0.282 | 0.231          |
|                  |                        |                                   | GC-Skew    | -0.203       | -0.194 | 0.269  | -0.01  | 0.324  | 0.309  | -0.083         |
| Phylliidae       | <i>Pulchriphyllium</i> | <i>Pulchriphyllium bioculatum</i> | Length(bp) | 16,868       | 6,750  | 4,302  | 897    | 528    | 2052   | 2158           |
|                  |                        |                                   | A+T%       | 74.9         | 73.3   | 76.8   | 80.9   | 75     | 77.8   | 71.4           |
|                  |                        |                                   | AT-Skew    | 0.223        | 0.147  | -0.436 | 0.125  | -0.157 | -0.322 | -0.008         |
|                  |                        |                                   | GC-Skew    | -0.255       | -0.228 | 0.305  | 0.041  | 0.424  | 0.335  | -0.220         |
| Phylliidae       | <i>Pulchriphyllium</i> | <i>Pulchriphyllium giganteum</i>  | Length(bp) | 16686        | 6768   | 4299   | 897    | 528    | 2052   | 2142           |
|                  |                        |                                   | A+T%       | 73.8         | 72.2   | 75.9   | 79     | 74.9   | 77.3   | 68.6           |
|                  |                        |                                   | AT-Skew    | 0.236        | 0.147  | -0.449 | 0.142  | -0.167 | -0.289 | 0.064          |
|                  |                        |                                   | GC-Skew    | -0.22        | -0.19  | 0.265  | 0.016  | 0.142  | 0.270  | -0.223         |
| Lonchodidae      | <i>Carausius</i>       | <i>Carausius</i> sp.              | Length(bp) | 16,198       | 6,750  | 4,302  | 915    | 520    | 2053   | 1661           |
|                  |                        |                                   | A+T%       | 77.4         | 75.7   | 77.7   | 80     | 78     | 79.2   | 80.3           |
|                  |                        |                                   | AT-Skew    | 0.160        | 0.058  | -0.315 | 0.082  | -0.133 | -0.202 | 0.163          |
|                  |                        |                                   | GC-Skew    | -0.211       | -0.176 | 0.256  | -0.016 | 0.368  | 0.28   | -0.214         |
| Lonchodidae      | <i>Lopaphus</i>        | <i>Lopaphus sphalerus</i>         | Length(bp) | 17,761       | 6,807  | 4,305  | 940    | 545    | 2063   | 3107           |
|                  |                        |                                   | A+T%       | 78.2         | 75.8   | 79.1   | 81.1   | 79.5   | 79.5   | 80.8           |
|                  |                        |                                   | AT-Skew    | 0.217        | 0.106  | -0.396 | 0.085  | -0.104 | -0.265 | 0.230          |
|                  |                        |                                   | GC-Skew    | -0.152       | -0.13  | 0.253  | 0.067  | 0.411  | 0.294  | 0.021          |
| Lonchodidae      | <i>Phraortes</i>       | <i>Phraortes lianzhouensis</i>    | Length(bp) | 16,690       | 6,768  | 4,296  | 922    | 529    | 2061   | 2122           |

|             |                     |                               |            |        |        |        |        |        |        |        |
|-------------|---------------------|-------------------------------|------------|--------|--------|--------|--------|--------|--------|--------|
| Lonchodidae | <i>Marmessoidea</i> | <i>Marmessoidea bispinus</i>  | A+T%       | 77.7   | 75.5   | 78.5   | 79.5   | 78     | 78.4   | 81.7   |
|             |                     |                               | AT-Skew    | 0.168  | 0.075  | -0.366 | 0.074  | -0.141 | -0.225 | 0.053  |
|             |                     |                               | GC-Skew    | -0.121 | -0.103 | 0.216  | 0.037  | 0.414  | 0.251  | 0.191  |
|             |                     |                               | Length(bp) | 16,630 | 6,789  | 4,302  | 926    | 525    | 2047   | 2032   |
|             |                     |                               | A+T%       | 75.8   | 73     | 77.3   | 79.8   | 79.6   | 78.6   | 76.3   |
|             |                     |                               | AT-Skew    | 0.189  | 0.101  | -0.353 | 0.08   | -0.105 | -0.229 | 0.151  |
|             |                     |                               | GC-Skew    | -0.188 | -0.154 | 0.235  | 0.037  | 0.421  | 0.277  | -0.178 |
| Lonchodidae | <i>Lopaphus</i>     | <i>Lopaphus albopunctatus</i> | Length(bp) | 15,011 | 6,798  | 4,308  | 934    | 539    | 2053   | 386    |
|             |                     |                               | A+T%       | 79.3   | 77.8   | 81.0   | 80.3   | 80.5   | 80.7   | 76.2   |
|             |                     |                               | AT-Skew    | 0.176  | 0.072  | -0.33  | 0.053  | -0.078 | -0.217 | 0.412  |
|             |                     |                               | GC-Skew    | -0.118 | -0.066 | 0.169  | 0.054  | 0.39   | 0.259  | 0.042  |
|             |                     |                               | Length(bp) | 16,376 | 6,774  | 4,296  | 845    | 596    | 2036   | 1842   |
| Lonchodidae | <i>Stheneboea</i>   | <i>Stheneboea repudiosa</i>   | A+T%       | 78.5   | 76.2   | 79.1   | 82.1   | 78.4   | 79.8   | 82.1   |
|             |                     |                               | AT-Skew    | 0.196  | 0.102  | -0.376 | 0.115  | -0.122 | -0.249 | 0.113  |
|             |                     |                               | GC-Skew    | -0.237 | -0.186 | 0.295  | -0.007 | 0.442  | 0.301  | -0.263 |

---
