# Supplementary material for: Nine Mitochondrial Genomes of Phasmatodea with Two Novel Mitochondrial Gene Rearrangements and Phylogeny
Source: MDPI journal article supplement (doi:10.3390/insects14050485), 2023-05-22
Supplement: s1 [file s1]

Table S3. Location of features in newly sequenced mitogenomes.

A. *Sungaya inexpectata*

| Gene                      | Strand | Position    | Length<br>(nuc.) | Anticodon | Start<br>codon | Stop<br>codon | Intergenic<br>nucleotides |
|---------------------------|--------|-------------|------------------|-----------|----------------|---------------|---------------------------|
| tRNA <sup>Ile</sup>       | +      | 1-69        | 69               | ATC       |                |               | -3                        |
| tRNA <sup>Gln</sup>       | -      | 67-135      | 69               | CAA       |                |               | -1                        |
| tRNA <sup>Met</sup>       | +      | 135-200     | 66               | ATG       |                |               | 0                         |
| ND2                       | +      | 201-1214    | 1014             |           | ATT            | TAA           | -2                        |
| tRNA <sup>Trp</sup>       | +      | 1213-1279   | 67               | TGA       |                |               | -8                        |
| tRNA <sup>Cys</sup>       | -      | 1272-1336   | 65               | TGC       |                |               | +3                        |
| tRNA <sup>Tyr</sup>       | -      | 1340-1403   | 64               | TAC       |                |               | +1                        |
| COX1                      | +      | 1405-2938   | 1534             |           | ATG            | T             | 0                         |
| tRNA <sup>Leu2(UUA)</sup> | +      | 2939-3002   | 64               | TTA       |                |               | 0                         |
| COX2                      | +      | 3003-3672   | 670              |           | ATA            | T             | 0                         |
| tRNA <sup>Lys</sup>       | +      | 3673-3742   | 70               | AAG       |                |               | -1                        |
| tRNA <sup>Asp</sup>       | +      | 3742-3806   | 65               | GAC       |                |               | 1                         |
| ATP8                      | +      | 3808-3963   | 156              |           | ATT            | TAA           | -4                        |
| ATP6                      | +      | 3960-4634   | 675              |           | ATA            | TAA           | -1                        |
| COX3                      | +      | 4634-5419   | 786              |           | ATG            | TAA           | -1                        |
| tRNA <sup>Gly</sup>       | +      | 5419-5482   | 64               | GGA       |                |               | 0                         |
| ND3                       | +      | 5483-5836   | 354              |           | ATT            | TAG           | -2                        |
| tRNA <sup>Ala</sup>       | +      | 5835-5899   | 65               | GCA       |                |               | 0                         |
| tRNA <sup>Arg</sup>       | +      | 5900-5968   | 69               | CGA       |                |               | +4                        |
| tRNA <sup>Asn</sup>       | +      | 5973-6036   | 64               | AAC       |                |               | 0                         |
| tRNA <sup>Ser1</sup>      | +      | 6037-6104   | 68               | AGC       |                |               | +1                        |
| tRNA <sup>Glu</sup>       | +      | 6106-6169   | 64               | GAA       |                |               | -2                        |
| tRNA <sup>Phe</sup>       | -      | 6168-6233   | 66               | TTC       |                |               | -1                        |
| ND5                       | -      | 6233-7956   | 1724             |           | ATT            | T             | 0                         |
| tRNA <sup>His</sup>       | -      | 7957-8021   | 65               | CAC       |                |               | -1                        |
| ND4                       | -      | 8021-9352   | 1332             |           | ATG            | TAA           | -7                        |
| ND4L                      | -      | 9346-9630   | 285              |           | ATT            | TAA           | +8                        |
| tRNA <sup>Thr</sup>       | +      | 9639-9703   | 65               | ACA       |                |               | 0                         |
| tRNA <sup>Pro</sup>       | -      | 9704-9771   | 68               | CCA       |                |               | +1                        |
| ND6                       | +      | 9773-10255  | 483              |           | ATT            | TAA           | -1                        |
| Cytb                      | +      | 10255-11388 | 1134             |           | ATG            | TAG           | -2                        |
| tRNA <sup>Ser2</sup>      | +      | 11387-11454 | 68               | TCA       |                |               | -2                        |
| ND1                       | -      | 11453-12421 | 969              |           | TTG            | TAA           | 0                         |
| tRNA <sup>Leu1(CUA)</sup> | -      | 12422-12487 | 66               | CTA       |                |               | 0                         |
| 16S rRNA                  | -      | 12488-13792 | 1305             |           |                |               | 0                         |
| tRNA <sup>Val</sup>       | -      | 13793-13862 | 70               | GTA       |                |               | 0                         |
| 12S rRNA                  | -      | 13863-14640 | 778              |           |                |               | 0                         |
| CR                        |        | 14641-17368 | 2728             |           |                |               |                           |

B. *Pulchruphyllium bioculatum*

| Gene                      | Strand | Position    | Length<br>(nuc.) | Anticodon | Start<br>codon | Stop<br>codon | Intergenic<br>nucleotides |
|---------------------------|--------|-------------|------------------|-----------|----------------|---------------|---------------------------|
| tRNA <sup>Ile</sup>       | +      | 1-66        | 66               | ATC       |                |               | -3                        |
| tRNA <sup>Gln</sup>       | -      | 64-131      | 68               | CAA       |                |               | -1                        |
| tRNA <sup>Met</sup>       | +      | 131-195     | 65               | ATG       |                |               | 0                         |
| ND2                       | +      | 196-1189    | 994              |           | ATT            | T             | -2                        |
| tRNA <sup>Trp</sup>       | +      | 1190-1252   | 63               | TGA       |                |               | -8                        |
| tRNA <sup>Cys</sup>       | -      | 1245-1306   | 62               | TGC       |                |               | +1                        |
| tRNA <sup>Tyr</sup>       | -      | 1308-1374   | 67               | TAC       |                |               | +1                        |
| COX1                      | +      | 1376-2909   | 1534             |           | ATG            | T             | 0                         |
| tRNA <sup>Leu2(UUA)</sup> | +      | 2910-2973   | 64               | TTA       |                |               | 0                         |
| COX2                      | +      | 2974-3625   | 652              |           | ATT            | T             | 0                         |
| tRNA <sup>Lys</sup>       | +      | 3626-3694   | 69               | AAG       |                |               | -1                        |
| tRNA <sup>Asp</sup>       | +      | 3694-3759   | 66               | GAC       |                |               | 0                         |
| ATP8                      | +      | 3760-3912   | 153              |           | ATA            | TAA           | -4                        |
| ATP6                      | +      | 3909-4583   | 675              |           | ATA            | TAA           | -1                        |
| COX3                      | +      | 4583-5365   | 783              |           | ATG            | TAA           | -1                        |
| tRNA <sup>Gly</sup>       | +      | 5365-5426   | 62               | GGA       |                |               | 0                         |
| ND3                       | +      | 5427-5778   | 352              |           | ATA            | T             | 0                         |
| tRNA <sup>Ala</sup>       | +      | 5779-5841   | 63               | GCA       |                |               | 0                         |
| tRNA <sup>Arg</sup>       | +      | 5842-5907   | 66               | CGA       |                |               | +2                        |
| tRNA <sup>Asn</sup>       | +      | 5910-5973   | 64               | AAC       |                |               | -2                        |
| tRNA <sup>Ser1</sup>      | +      | 5972-6033   | 62               | AGC       |                |               | +1                        |
| tRNA <sup>Glu</sup>       | +      | 6033-6098   | 66               | GAA       |                |               | -2                        |
| tRNA <sup>Phe</sup>       | -      | 6097-6163   | 67               | TTC       |                |               | 0                         |
| ND5                       | -      | 6164-7885   | 1722             |           | ATA            | TAG           | 0                         |
| tRNA <sup>His</sup>       | -      | 7886-7950   | 65               | CAC       |                |               | -3                        |
| ND4                       | -      | 7948-9277   | 1330             |           | ATG            | T             | -7                        |
| ND4L                      | -      | 9271-9555   | 285              |           | ATT            | TAA           | +8                        |
| tRNA <sup>Thr</sup>       | +      | 9564-9624   | 61               | ACA       |                |               | 0                         |
| tRNA <sup>Pro</sup>       | -      | 9625-9689   | 65               | CCA       |                |               | +1                        |
| ND6                       | +      | 9691-10173  | 483              |           | ATT            | TAA           | -1                        |
| Cytb                      | +      | 10173-11297 | 1125             |           | ATG            | TAA           | 0                         |
| tRNA <sup>Ser2</sup>      | +      | 11298-11357 | 60               | TCA       |                |               | +198                      |
| ND1                       | -      | 11556-12521 | 966              |           | ATA            | TAA           | +3                        |
| tRNA <sup>Leu1(CUA)</sup> | -      | 12525-12590 | 66               | CTA       |                |               | 0                         |
| 16S rRNA                  | -      | 12591-13859 | 1269             |           |                |               | 0                         |
| tRNA <sup>Val</sup>       | -      | 13860-13927 | 68               | GTA       |                |               | 0                         |
| 12S rRNA                  | -      | 13928-14710 | 783              |           |                |               | 0                         |
| CR                        |        | 14711-16868 | 2158             |           |                |               |                           |

*C. Carausius* sp.

| Gene                      | Strand | Position    | Length<br>(nuc.) | Anticodon | Start<br>codon | Stop<br>codon | Intergenic<br>nucleotides |
|---------------------------|--------|-------------|------------------|-----------|----------------|---------------|---------------------------|
| tRNA <sup>Ile</sup>       | +      | 1-66        | 66               | ATC       |                |               | -3                        |
| tRNA <sup>Gln</sup>       | -      | 64-133      | 70               | CAA       |                |               | -1                        |
| tRNA <sup>Met</sup>       | +      | 133-198     | 66               | ATG       |                |               | 0                         |
| ND2                       | +      | 199-1185    | 987              |           | ATC            | TAA           | -2                        |
| tRNA <sup>Trp</sup>       | +      | 1184-1249   | 66               | TGA       |                |               | -8                        |
| tRNA <sup>Cys</sup>       | -      | 1242-1302   | 61               | TGC       |                |               | 0                         |
| tRNA <sup>Tyr</sup>       | -      | 1303-1366   | 64               | TAC       |                |               | +1                        |
| COX1                      | +      | 1368-2901   | 1534             |           | ATG            | T             | 0                         |
| tRNA <sup>Leu2(UUA)</sup> | +      | 2902-2967   | 66               | TTA       |                |               | 0                         |
| COX2                      | +      | 2968-3637   | 670              |           | ATT            | T             | 0                         |
| tRNA <sup>Lys</sup>       | +      | 3638-3707   | 70               | AAG       |                |               | -1                        |
| tRNA <sup>Asp</sup>       | +      | 3707-3774   | 68               | GAC       |                |               | 0                         |
| ATP8                      | +      | 3775-3930   | 156              |           | ATA            | TAA           | -4                        |
| ATP6                      | +      | 3927-4592   | 666              |           | ATA            | TAA           | -1                        |
| COX3                      | +      | 4592-5374   | 783              |           | ATG            | TAA           | -1                        |
| tRNA <sup>Gly</sup>       | +      | 5374-5435   | 62               | GGA       |                |               | 0                         |
| ND3                       | +      | 5436-5786   | 351              |           | ATT            | TAA           | -2                        |
| tRNA <sup>Arg</sup>       | +      | 5785-5848   | 64               | CGA       |                |               | +2                        |
| tRNA <sup>Ala</sup>       | +      | 5851-5913   | 63               | GCA       |                |               | +19                       |
| tRNA <sup>Asn</sup>       | +      | 5933-5997   | 65               | AAC       |                |               | -1                        |
| tRNA <sup>Ser1</sup>      | +      | 5997-6059   | 63               | AGC       |                |               | -1                        |
| tRNA <sup>Glu</sup>       | +      | 6059-6124   | 66               | GAA       |                |               | -2                        |
| tRNA <sup>Phe</sup>       | -      | 6123-6184   | 62               | TTC       |                |               | 0                         |
| ND5                       | -      | 6185-7905   | 1721             |           | ATT            | TA            | 0                         |
| tRNA <sup>His</sup>       | -      | 7906-7967   | 62               | CAC       |                |               | +1                        |
| ND4                       | -      | 7969-9300   | 1332             |           | ATG            | TAG           | -7                        |
| ND4L                      | -      | 9294-9578   | 285              |           | ATA            | TAA           | +8                        |
| tRNA <sup>Thr</sup>       | +      | 9587-9650   | 64               | ACA       |                |               | 0                         |
| tRNA <sup>Pro</sup>       | -      | 9651-9714   | 64               | CCA       |                |               | +1                        |
| ND6                       | +      | 9716-10186  | 471              |           | ATT            | TAA           | -1                        |
| Cytb                      | +      | 10186-11319 | 1134             |           | ATG            | TAA           | -2                        |
| tRNA <sup>Ser2</sup>      | +      | 11318-11383 | 66               | TCA       |                |               | -2                        |
| ND1                       | -      | 11382-12347 | 966              |           | TTG            | TAA           | 0                         |
| tRNA <sup>Leu1(CUA)</sup> | -      | 12348-12413 | 66               | CTA       |                |               | 0                         |
| 16S rRNA                  | -      | 12414-13676 | 1263             |           |                |               | 0                         |
| tRNA <sup>Val</sup>       | -      | 13677-13747 | 71               | GTA       |                |               | 0                         |
| 12S rRNA                  | -      | 13748-14537 | 790              |           |                |               | 0                         |
| CR                        |        | 14538-16198 | 1661             |           |                |               |                           |

D. *Sthenoboea repudiosa*

| Gene                      | Strand | Position    | Length<br>(nuc.) | Anticodon | Start<br>codon | Stop<br>codon | Intergenic<br>nucleotides |
|---------------------------|--------|-------------|------------------|-----------|----------------|---------------|---------------------------|
| tRNA <sup>Gln</sup>       | -      | 1-69        | 69               | CAA       |                |               | -1                        |
| tRNA <sup>Met</sup>       | +      | 69-134      | 66               | ATG       |                |               | 0                         |
| ND2                       | +      | 135-1122    | 988              |           | ATA            | T             | 0                         |
| tRNA <sup>Trp</sup>       | +      | 1123-1187   | 65               | TGA       |                |               | -8                        |
| tRNA <sup>Cys</sup>       | -      | 1180-1241   | 62               | TGC       |                |               | 0                         |
| tRNA <sup>Tyr</sup>       | -      | 1242-1309   | 68               | TAC       |                |               | +1                        |
| COX1                      | +      | 1311-2844   | 1534             |           | ATG            | T             | 0                         |
| tRNA <sup>Leu2(UUA)</sup> | +      | 2845-2908   | 64               | TTA       |                |               | 0                         |
| COX2                      | +      | 2909-3577   | 669              |           | ATA            | TAA           | 0                         |
| tRNA <sup>Lys</sup>       | +      | 3578-3648   | 71               | AAG       |                |               | 0                         |
| tRNA <sup>Asp</sup>       | +      | 3649-3712   | 64               | GAC       |                |               | +1                        |
| ATP8                      | +      | 3714-3869   | 156              |           | ATA            | TAA           | -4                        |
| ATP6                      | +      | 3866-4537   | 672              |           | ATA            | TAA           | -1                        |
| COX3                      | +      | 4537-5325   | 789              |           | ATG            | TAA           | -1                        |
| tRNA <sup>Gly</sup>       | +      | 5325-5387   | 63               | GGA       |                |               | 0                         |
| ND3                       | +      | 5388-5739   | 352              |           | ATT            | T             | 0                         |
| tRNA <sup>Ala</sup>       | +      | 5740-5804   | 65               | GCA       |                |               | -1                        |
| tRNA <sup>Arg</sup>       | +      | 5804-5868   | 65               | CGA       |                |               | +2                        |
| tRNA <sup>Asn</sup>       | +      | 5871-5935   | 65               | AAC       |                |               | 0                         |
| tRNA <sup>Ser1</sup>      | +      | 5936-5997   | 62               | AGC       |                |               | 0                         |
| tRNA <sup>Glu</sup>       | +      | 5998-6064   | 67               | GAA       |                |               | -3                        |
| tRNA <sup>Phe</sup>       | -      | 6062-6125   | 64               | TTC       |                |               | 0                         |
| ND5                       | -      | 6126-7848   | 1723             |           | ATT            | T             | 0                         |
| tRNA <sup>His</sup>       | -      | 7849-7912   | 64               | CAC       |                |               | 0                         |
| ND4                       | -      | 7913-9239   | 1327             |           | ATG            | T             | -7                        |
| ND4L                      | -      | 9233-9520   | 288              |           | ATG            | TAA           | +5                        |
| tRNA <sup>Thr</sup>       | +      | 9526-9588   | 63               | ACA       |                |               | 0                         |
| tRNA <sup>Pro</sup>       | -      | 9589-9657   | 69               | CCA       |                |               | +1                        |
| ND6                       | +      | 9659-10135  | 477              |           | ATA            | TAA           | -1                        |
| Cytb                      | +      | 10135-11268 | 1134             |           | ATG            | TAG           | -2                        |
| tRNA <sup>Ser2</sup>      | +      | 11267-11331 | 65               | TCA       |                |               | +7                        |
| ND1                       | -      | 11339-12298 | 960              |           | TTG            | TAA           | 0                         |
| tRNA <sup>Leu1(CUA)</sup> | -      | 12299-12365 | 67               | CTA       |                |               | 0                         |
| 16S rRNA                  | -      | 12366-13629 | 1264             |           |                |               | 0                         |
| tRNA <sup>Val</sup>       | -      | 13630-13697 | 68               | GTA       |                |               | 0                         |
| 12S rRNA                  | -      | 13698-14469 | 772              |           |                |               | 0                         |
| CR                        |        | 14470-15449 | 980              |           |                |               | 0                         |
| tRNA <sup>Ile</sup>       | -      | 15450-15514 | 65               | ATC       |                |               | 0                         |
| CR                        |        | 15515-16376 | 862              |           |                |               |                           |

*E. Lopaphus sphalerus*

| Gene                      | Strand | Position    | Length<br>(nuc.) | Anticodon | Start<br>codon | Stop<br>codon | Intergenic<br>nucleotides |
|---------------------------|--------|-------------|------------------|-----------|----------------|---------------|---------------------------|
| tRNA <sup>Ile</sup>       | +      | 1-67        | 67               | ATC       |                |               | +2                        |
| tRNA <sup>Gln</sup>       | -      | 70-138      | 69               | CAA       |                |               | -1                        |
| tRNA <sup>Met</sup>       | +      | 138-205     | 68               | ATG       |                |               | 0                         |
| ND2                       | +      | 206-1225    | 1020             |           | ATT            | TAA           | -2                        |
| tRNA <sup>Trp</sup>       | +      | 1224-1290   | 67               | TGA       |                |               | -8                        |
| tRNA <sup>Cys</sup>       | -      | 1283-1346   | 64               | TGC       |                |               | +2                        |
| tRNA <sup>Tyr</sup>       | -      | 1349-1417   | 69               | TAC       |                |               | +1                        |
| COX1                      | +      | 1419-2952   | 1534             |           | ATG            | T             | 0                         |
| tRNA <sup>Leu2(UUA)</sup> | +      | 2953-3018   | 66               | TTA       |                |               | 0                         |
| COX2                      | +      | 3019-3688   | 670              |           | ATT            | T             | 0                         |
| tRNA <sup>Lys</sup>       | +      | 3689-3758   | 70               | AAG       |                |               | -1                        |
| tRNA <sup>Asp</sup>       | +      | 3758-3828   | 71               | GAC       |                |               | 0                         |
| ATP8                      | +      | 3829-3987   | 159              |           | ATA            | TAA           | -4                        |
| ATP6                      | +      | 3984-4658   | 675              |           | ATA            | TAA           | -1                        |
| COX3                      | +      | 4658-5444   | 787              |           | ATG            | T             | 0                         |
| tRNA <sup>Gly</sup>       | +      | 5445-5509   | 65               | GGA       |                |               | 0                         |
| ND3                       | +      | 5510-5861   | 352              |           | ATA            | T             | 0                         |
| tRNA <sup>Ala</sup>       | +      | 5862-5930   | 69               | GCA       |                |               | 0                         |
| tRNA <sup>Arg</sup>       | +      | 5931-5995   | 65               | CGA       |                |               | +2                        |
| tRNA <sup>Asn</sup>       | +      | 5993-6058   | 66               | AAC       |                |               | 0                         |
| tRNA <sup>Ser1</sup>      | +      | 6059-6126   | 68               | AGC       |                |               | +1                        |
| tRNA <sup>Glu</sup>       | +      | 6128-6192   | 65               | GAA       |                |               | -2                        |
| tRNA <sup>Phe</sup>       | -      | 6191-6257   | 67               | TTC       |                |               | 0                         |
| ND5                       | -      | 6258-7980   | 1723             |           | ATT            | T             | 0                         |
| tRNA <sup>His</sup>       | -      | 7981-8045   | 65               | CAC       |                |               | -3                        |
| ND4                       | -      | 8046-9377   | 1332             |           | ATG            | TAA           | -7                        |
| ND4L                      | -      | 9371-9661   | 285              |           | ATT            | TAA           | +2                        |
| tRNA <sup>Thr</sup>       | +      | 9664-9730   | 67               | ACA       |                |               | +5                        |
| tRNA <sup>Pro</sup>       | -      | 9736-9805   | 70               | CCA       |                |               | +1                        |
| ND6                       | +      | 9807-10286  | 480              |           | ATA            | TAA           | -1                        |
| Cytb                      | +      | 10286-11419 | 1134             |           | ATG            | TAA           | -1                        |
| tRNA <sup>Ser2</sup>      | +      | 11419-11483 | 65               | TCA       |                |               | -2                        |
| ND1                       | -      | 11482-12447 | 966              |           | ATA            | TAA           | +3                        |
| tRNA <sup>Leu1(CUA)</sup> | -      | 12451-12521 | 71               | CTA       |                |               | 0                         |
| 16S rRNA                  | -      | 12522-13804 | 1283             |           |                |               | 0                         |
| tRNA <sup>Val</sup>       | -      | 13805-13874 | 70               | GTA       |                |               | 0                         |
| 12S rRNA                  | -      | 13875-14654 | 780              |           |                |               | 0                         |
| CR                        |        | 14655-17761 | 3107             |           |                |               |                           |

F. *Phraortes lianzhouensis*

| Gene                      | Strand | Position    | Length<br>(nuc.) | Anticodon | Start<br>codon | Stop<br>codon | Intergenic<br>nucleotides |
|---------------------------|--------|-------------|------------------|-----------|----------------|---------------|---------------------------|
| tRNA <sup>Ile</sup>       | +      | 1-66        | 66               | ATC       |                |               | +2                        |
| tRNA <sup>Gln</sup>       | -      | 69-137      | 69               | CAA       |                |               | -1                        |
| tRNA <sup>Met</sup>       | +      | 137-200     | 64               | ATG       |                |               | 0                         |
| ND2                       | +      | 201-1193    | 993              |           | ATC            | TAA           | -2                        |
| tRNA <sup>Trp</sup>       | +      | 1192-1256   | 65               | TGA       |                |               | -8                        |
| tRNA <sup>Cys</sup>       | -      | 1249-1310   | 62               | TGC       |                |               | -1                        |
| tRNA <sup>Tyr</sup>       | -      | 1310-1373   | 64               | TAC       |                |               | +1                        |
| COX1                      | +      | 1375-2908   | 1534             |           | ATG            | T             | 0                         |
| tRNA <sup>Leu2(UUA)</sup> | +      | 2909-2973   | 65               | TTA       |                |               | 0                         |
| COX2                      | +      | 2974-3640   | 667              |           | ATA            | T             | 0                         |
| tRNA <sup>Lys</sup>       | +      | 3641-3710   | 70               | AAG       |                |               | -1                        |
| tRNA <sup>Asp</sup>       | +      | 3710-3774   | 65               | GAC       |                |               | +1                        |
| ATP8                      | +      | 3776-3934   | 159              |           | ATG            | TAA           | -4                        |
| ATP6                      | +      | 3931-4605   | 675              |           | ATA            | TAA           | -1                        |
| COX3                      | +      | 4605-5391   | 787              |           | ATG            | T             | 0                         |
| tRNA <sup>Gly</sup>       | +      | 5392-5456   | 65               | GGA       |                |               | 0                         |
| ND3                       | +      | 5457-5810   | 354              |           | ATT            | TAG           | -2                        |
| tRNA <sup>Ala</sup>       | +      | 5809-5873   | 65               | GCA       |                |               | -1                        |
| tRNA <sup>Arg</sup>       | +      | 5873-5940   | 68               | CGA       |                |               | +3                        |
| tRNA <sup>Asn</sup>       | +      | 5944-6008   | 65               | AAC       |                |               | 0                         |
| tRNA <sup>Ser1</sup>      | +      | 6009-6075   | 67               | AGC       |                |               | 0                         |
| tRNA <sup>Glu</sup>       | +      | 6076-6139   | 64               | GAA       |                |               | -2                        |
| tRNA <sup>Phe</sup>       | -      | 6138-6201   | 64               | TTC       |                |               | 0                         |
| ND5                       | -      | 6202-7925   | 1724             |           | ATT            | T             | 0                         |
| tRNA <sup>His</sup>       | -      | 7926-7993   | 68               | CAC       |                |               | -1                        |
| ND4                       | -      | 7993-9318   | 1326             |           | ATA            | TAG           | -7                        |
| ND4L                      | -      | 9312-9596   | 285              |           | ATA            | TAA           | +8                        |
| tRNA <sup>Thr</sup>       | +      | 9605-9669   | 65               | ACA       |                |               | 0                         |
| tRNA <sup>Pro</sup>       | -      | 9670-9734   | 65               | CCA       |                |               | +1                        |
| ND6                       | +      | 9736-10206  | 471              |           | ATA            | TAA           | -1                        |
| Cytb                      | +      | 10206-11336 | 1131             |           | ATG            | TAG           | -2                        |
| tRNA <sup>Ser2</sup>      | +      | 11335-11402 | 68               | TCA       |                |               | +1                        |
| ND1                       | -      | 11404-12367 | 964              |           | ATT            | T             | +3                        |
| tRNA <sup>Leu1(CUA)</sup> | -      | 12371-12438 | 68               | CTA       |                |               | 0                         |
| 16S rRNA                  | -      | 12439-13719 | 1281             |           |                |               | 0                         |
| tRNA <sup>Val</sup>       | -      | 13720-13788 | 69               | GTA       |                |               | 0                         |
| 12S rRNA                  | -      | 13789-14568 | 780              |           |                |               | 0                         |
| CR                        |        | 14569-16690 | 2122             |           |                |               |                           |

*G. Marmessoidea bispinus*

| Gene                      | Strand | Position    | Length<br>(nuc.) | Anticodon | Start<br>codon | Stop<br>codon | Intergenic<br>nucleotides |
|---------------------------|--------|-------------|------------------|-----------|----------------|---------------|---------------------------|
| tRNA <sup>Ile</sup>       | +      | 1-67        | 67               | ATC       |                |               | 0                         |
| tRNA <sup>Gln</sup>       | -      | 68-133      | 66               | CAA       |                |               | -1                        |
| tRNA <sup>Met</sup>       | +      | 133-201     | 69               | ATG       |                |               | 0                         |
| ND2                       | +      | 202-1200    | 999              |           | ATT            | TAA           | -2                        |
| tRNA <sup>Trp</sup>       | +      | 1199-1264   | 66               | TGA       |                |               | -8                        |
| tRNA <sup>Cys</sup>       | -      | 1257-1318   | 62               | TGC       |                |               | +3                        |
| tRNA <sup>Tyr</sup>       | -      | 1322-1388   | 67               | TAC       |                |               | +1                        |
| COX1                      | +      | 1390-2923   | 1534             |           | ATG            | T             | 0                         |
| tRNA <sup>Leu2(UUA)</sup> | +      | 2924-2988   | 65               | TTA       |                |               | 0                         |
| COX2                      | +      | 2989-3658   | 670              |           | ATA            | T             | 0                         |
| tRNA <sup>Lys</sup>       | +      | 3659-3729   | 71               | AAG       |                |               | -1                        |
| tRNA <sup>Asp</sup>       | +      | 3729-3794   | 66               | GAC       |                |               | +1                        |
| ATP8                      | +      | 3796-3954   | 159              |           | ATG            | TAA           | -4                        |
| ATP6                      | +      | 3951-4619   | 669              |           | ATA            | TAA           | -1                        |
| COX3                      | +      | 4619-5407   | 789              |           | ATG            | TAA           | -1                        |
| tRNA <sup>Gly</sup>       | +      | 5407-5470   | 64               | GGA       |                |               | 0                         |
| ND3                       | +      | 5471-5822   | 352              |           | ATT            | T             | 0                         |
| tRNA <sup>Ala</sup>       | +      | 5823-5886   | 64               | GCA       |                |               | 0                         |
| tRNA <sup>Arg</sup>       | +      | 5887-5950   | 64               | CGA       |                |               | +4                        |
| tRNA <sup>Asn</sup>       | +      | 5955-6020   | 66               | AAC       |                |               | 0                         |
| tRNA <sup>Ser1</sup>      | +      | 6021-6088   | 68               | AGC       |                |               | 0                         |
| tRNA <sup>Glu</sup>       | +      | 6089-6153   | 65               | GAA       |                |               | +2                        |
| tRNA <sup>Phe</sup>       | -      | 6156-6221   | 66               | TTC       |                |               | +9                        |
| ND5                       | -      | 6231-7943   | 1713             |           | ATT            | TAA           | 0                         |
| tRNA <sup>His</sup>       | -      | 7944-8007   | 64               | CAC       |                |               | +1                        |
| ND4                       | -      | 8009-9340   | 1332             |           | GTG            | TAG           | -7                        |
| ND4L                      | -      | 9334-9624   | 291              |           | ATG            | TAA           | +7                        |
| tRNA <sup>Thr</sup>       | +      | 9632-9695   | 64               | ACA       |                |               | 0                         |
| tRNA <sup>Pro</sup>       | -      | 9696-9760   | 65               | CCA       |                |               | +2                        |
| ND6                       | +      | 9763-10245  | 483              |           | ATT            | TAA           | -1                        |
| Cytb                      | +      | 10245-11381 | 1137             |           | ATG            | TAA           | +1                        |
| tRNA <sup>Ser2</sup>      | +      | 11383-11449 | 67               | TCA       |                |               | -2                        |
| ND1                       | -      | 11448-12413 | 966              |           | ATA            | TAA           | +3                        |
| tRNA <sup>Leu1(CUA)</sup> | -      | 12417-12482 | 66               | CTA       |                |               | 0                         |
| 16S rRNA                  | -      | 12483-13762 | 1280             |           |                |               | 0                         |
| tRNA <sup>Val</sup>       | -      | 13763-13831 | 69               | GTA       |                |               | 0                         |
| 12S rRNA                  | -      | 13832-14598 | 767              |           |                |               | 0                         |
| CR                        |        | 14599-16630 | 2032             |           |                |               | 0                         |

H. *Lopaphus albopunctatus*

| Gene                      | Strand | Position    | Length<br>(nuc.) | Anticodon | Start<br>codon | Stop<br>codon | Intergenic<br>nucleotides |
|---------------------------|--------|-------------|------------------|-----------|----------------|---------------|---------------------------|
| tRNA <sup>Ile</sup>       | +      | 1-68        | 68               | ATC       |                |               | 0                         |
| tRNA <sup>Gln</sup>       | -      | 69-137      | 69               | CAA       |                |               | 0                         |
| tRNA <sup>Met</sup>       | +      | 138-204     | 67               | ATG       |                |               | 0                         |
| ND2                       | +      | 205-1218    | 1014             |           | ATT            | TAA           | -2                        |
| tRNA <sup>Trp</sup>       | +      | 1217-1282   | 66               | TGA       |                |               | -8                        |
| tRNA <sup>Cys</sup>       | -      | 1275-1337   | 63               | TGC       |                |               | +4                        |
| tRNA <sup>Tyr</sup>       | -      | 1342-1411   | 70               | TAC       |                |               | +1                        |
| COX1                      | +      | 1413-2946   | 1534             |           | ATG            | T             | 0                         |
| tRNA <sup>Leu2(UUA)</sup> | +      | 2947-3011   | 65               | TTA       |                |               | 0                         |
| COX2                      | +      | 3012-3681   | 670              |           | ATA            | T             | 0                         |
| tRNA <sup>Lys</sup>       | +      | 3682-3752   | 71               | AAG       |                |               | -1                        |
| tRNA <sup>Asp</sup>       | +      | 3752-3819   | 68               | GAC       |                |               | 0                         |
| ATP8                      | +      | 3820-3978   | 159              |           | ATA            | TAA           | -4                        |
| ATP6                      | +      | 3975-4649   | 675              |           | ATA            | TAA           | -1                        |
| COX3                      | +      | 4649-5437   | 789              |           | ATG            | TAA           | -1                        |
| tRNA <sup>Gly</sup>       | +      | 5437-5501   | 65               | GGA       |                |               | 0                         |
| ND3                       | +      | 5502-5853   | 352              |           | ATT            | T             | 0                         |
| tRNA <sup>Ala</sup>       | +      | 5854-5918   | 65               | GCA       |                |               | 0                         |
| tRNA <sup>Arg</sup>       | +      | 5919-5986   | 68               | CGA       |                |               | 0                         |
| tRNA <sup>Asn</sup>       | +      | 5987-6052   | 66               | AAC       |                |               | 0                         |
| tRNA <sup>Ser1</sup>      | +      | 6053-6120   | 68               | AGC       |                |               | 0                         |
| tRNA <sup>Glu</sup>       | +      | 6121-6185   | 65               | GAA       |                |               | -2                        |
| tRNA <sup>Phe</sup>       | -      | 6184-6249   | 66               | TTC       |                |               | -1                        |
| ND5                       | -      | 6249-7973   | 1725             |           | ATG            | TAA           | 0                         |
| tRNA <sup>His</sup>       | -      | 7974-8037   | 64               | CAC       |                |               | -1                        |
| ND4                       | -      | 8037-9368   | 1332             |           | ATG            | TAA           | -7                        |
| ND4L                      | -      | 9362-9646   | 285              |           | ATT            | TAA           | +8                        |
| tRNA <sup>Thr</sup>       | +      | 9655-9718   | 64               | ACA       |                |               | +6                        |
| tRNA <sup>Pro</sup>       | -      | 9725-9790   | 66               | CCA       |                |               | +1                        |
| ND6                       | +      | 9792-10265  | 474              |           | ATA            | TAA           | -1                        |
| Cytb                      | +      | 10265-11398 | 1134             |           | ATG            | TAG           | -2                        |
| tRNA <sup>Ser2</sup>      | +      | 11397-11464 | 68               | TCA       |                |               | -2                        |
| ND1                       | -      | 11463-12428 | 966              |           | ATA            | TAA           | +3                        |
| tRNA <sup>Leu1(CUA)</sup> | -      | 12432-12502 | 71               | CTA       |                |               | 0                         |
| 16S rRNA                  | -      | 12504-13789 | 1286             |           |                |               | 0                         |
| tRNA <sup>Val</sup>       | -      | 13790-13859 | 70               | GTA       |                |               | 0                         |
| 12S rRNA                  | -      | 13859-14625 | 767              |           |                |               | 0                         |
| CR                        |        | 14626-15011 | 386              |           |                |               |                           |



I. *Pulchruphyllium giganteum*

| Gene                      | Strand | Position    | Length<br>(nuc.) | Anticodon | Start<br>codon | Stop<br>codon | Intergenic<br>nucleotides |
|---------------------------|--------|-------------|------------------|-----------|----------------|---------------|---------------------------|
| tRNA <sup>Ile</sup>       | +      | 1-65        | 65               | ATC       |                |               | -3                        |
| tRNA <sup>Gln</sup>       | -      | 63-131      | 69               | CAA       |                |               | -1                        |
| tRNA <sup>Met</sup>       | +      | 131-194     | 64               | ATG       |                |               | 0                         |
| ND2                       | +      | 195-1193    | 999              |           | ATA            | TAA           | -2                        |
| tRNA <sup>Trp</sup>       | +      | 1192-1256   | 65               | TGA       |                |               | -8                        |
| tRNA <sup>Cys</sup>       | -      | 1249-1310   | 62               | TGC       |                |               | +1                        |
| tRNA <sup>Tyr</sup>       | -      | 1312-1375   | 64               | TAC       |                |               | +1                        |
| COX1                      | +      | 1377-2910   | 1534             |           | ATG            | T             | 0                         |
| tRNA <sup>Leu2(UUA)</sup> | +      | 2911-2973   | 63               | TTA       |                |               | 0                         |
| COX2                      | +      | 2974-3640   | 667              |           | ATA            | T             | 0                         |
| tRNA <sup>Lys</sup>       | +      | 3641-3709   | 69               | AAG       |                |               | -1                        |
| tRNA <sup>Asp</sup>       | +      | 3709-3772   | 64               | GAC       |                |               | 0                         |
| ATP8                      | +      | 3773-3925   | 153              |           | ATA            | TAA           | -4                        |
| ATP6                      | +      | 3922-4593   | 672              |           | ATA            | TAA           | -1                        |
| COX3                      | +      | 4593-5375   | 783              |           | ATG            | TAA           | -1                        |
| tRNA <sup>Gly</sup>       | +      | 5375-5436   | 62               | GGA       |                |               | 0                         |
| ND3                       | +      | 5437-5788   | 352              |           | ATA            | T             | 0                         |
| tRNA <sup>Ala</sup>       | +      | 5789-5854   | 66               | GCA       |                |               | 0                         |
| tRNA <sup>Arg</sup>       | +      | 5855-5918   | 64               | CGA       |                |               | +2                        |
| tRNA <sup>Asn</sup>       | +      | 5921-5985   | 65               | AAC       |                |               | 0                         |
| tRNA <sup>Ser1</sup>      | +      | 5986-6048   | 63               | AGC       |                |               | 0                         |
| tRNA <sup>Glu</sup>       | +      | 6049-6113   | 65               | GAA       |                |               | -2                        |
| tRNA <sup>Phe</sup>       | -      | 6112-6176   | 65               | TTC       |                |               | -1                        |
| ND5                       | -      | 6176-7894   | 1719             |           | ATT            | TAA           | 0                         |
| tRNA <sup>His</sup>       | -      | 7895-7957   | 63               | CAC       |                |               | 0                         |
| ND4                       | -      | 7958-9287   | 1330             |           | ATG            | T             | -7                        |
| ND4L                      | -      | 9281-9565   | 285              |           | ATG            | TAA           | -2                        |
| tRNA <sup>Thr</sup>       | +      | 9574-9636   | 63               | ACA       |                |               | 0                         |
| tRNA <sup>Pro</sup>       | -      | 9637-9698   | 62               | CCA       |                |               | +1                        |
| ND6                       | +      | 9700-10185  | 486              |           | ATA            | TAA           | -1                        |
| Cytb                      | +      | 10185-11309 | 1125             |           | ATG            | TAA           | +2                        |
| tRNA <sup>Ser2</sup>      | +      | 11312-11373 | 62               | TCA       |                |               | +15                       |
| ND1                       | -      | 11389-12354 | 966              |           | ATA            | TAG           | +3                        |
| tRNA <sup>Leu1(CUA)</sup> | -      | 12358-12423 | 66               | CTA       |                |               | 0                         |
| 16S rRNA                  | -      | 12424-13517 | 1292             |           |                |               | -2                        |
| tRNA <sup>Val</sup>       | -      | 13716-13784 | 69               | GTA       |                |               | 0                         |
| 12S rRNA                  | -      | 13785-14544 | 760              |           |                |               | 0                         |
| CR                        |        | 14545-16686 | 2142             |           |                |               |                           |
