# Supplementary material for: Nine Mitochondrial Genomes of Phasmatodea with Two Novel Mitochondrial Gene Rearrangements and Phylogeny
Source: MDPI journal article supplement (doi:10.3390/insects14050485), 2023-05-22
Supplement: s1 [file s1]

Table S8. Start and stop codons of the 13 PCGs in the sequenced mitochondrial genes.

| Gene \ Specie | <i>Sungaya inexpectata</i> | <i>Pulchriphyllium bioculatum</i> | <i>Pulchriphyllium giganteum</i> | <i>Carausius</i> sp | <i>Stheneboea repudiosa</i> | <i>Lopaphus sphalerus</i> | <i>Phraortes lianzhouensis</i> | <i>Marmessoidea bispinus</i> | <i>Lopaphus albopunctatus</i> |
|---------------|----------------------------|-----------------------------------|----------------------------------|---------------------|-----------------------------|---------------------------|--------------------------------|------------------------------|-------------------------------|
| ATP6          | ATA/TAA                    | ATA/TAA                           | ATA/TAA                          | ATA/TAA             | ATA/TAA                     | ATA/TAA                   | ATA/TAA                        | ATA/TAA                      | ATA/TAA                       |
| ATP8          | ATT/TAA                    | ATA/TAA                           | ATA/TAA                          | ATA/TAA             | ATA/TAA                     | ATT/TAA                   | ATG/TAA                        | ATG/TAA                      | ATA/TAA                       |
| COX1          | ATG/T                      | ATG/T                             | ATG/T                            | ATG/T               | ATG/T                       | ATG/T                     | ATG/T                          | ATG/T                        | ATG/T                         |
| COX2          | ATA/T                      | ATT/T                             | ATA/T                            | ATA/T               | ATA/TAA                     | ATA/T                     | ATA/T                          | ATA/T                        | ATA/T                         |
| COX3          | ATG/TAA                    | ATG/TAA                           | ATG/TAA                          | ATG/TAA             | ATG/TAA                     | ATG/T                     | ATG/T                          | ATG/TAA                      | ATG/TAA                       |
| Cytb          | ATG/TAG                    | ATG/TAA                           | ATG/TAA                          | ATG/TAA             | ATG/TAG                     | ATG/TAA                   | ATG/TAG                        | ATG/TAA                      | ATG/TAG                       |
| ND1           | ATT/TAA                    | ATA/TAA                           | ATA/TAG                          | TTG/TAA             | TTG/TAA                     | ATA/TAA                   | ATT/T                          | ATA/TAA                      | ATA/TAA                       |
| ND2           | ATT/TAA                    | ATT/TAA                           | ATA/TAA                          | ATC/TAA             | ATA/TAA                     | ATT/TAA                   | ATC/TAA                        | ATT/TAA                      | ATT/TAA                       |
| ND3           | ATT/TAG                    | ATA/T                             | ATA/T                            | ATT/TAA             | ATT/TAG                     | ATA/T                     | ATT/TAG                        | ATT/T                        | ATT/T                         |
| ND4           | ATG/TAA                    | ATG/T                             | ATG/T                            | ATG/TAG             | ATG/T                       | ATG/TAA                   | ATA/TAG                        | GTG/TAG                      | ATG/TAA                       |
| ND4L          | ATT/TAA                    | ATT/TAA                           | ATG/TAA                          | ATA/TAA             | ATA/TAA                     | ATT/TAA                   | ATA/TAA                        | ATG/TAA                      | ATT/TAA                       |
| ND5           | ATT/TA                     | ATA/TAG                           | ATT/TAA                          | ATT/TA              | ATT/T                       | ATT/T                     | ATT/TA                         | ATT/TAA                      | ATT/TAA                       |
| ND6           | ATT/TAA                    | ATT/TAA                           | ATA/TAA                          | ATA/TAA             | ATA/TAA                     | ATATAA                    | ATA/TAA                        | ATT/TAA                      | ATA/TAA                       |
