# Supplementary material for: Nine Mitochondrial Genomes of Phasmatodea with Two Novel Mitochondrial Gene Rearrangements and Phylogeny
Source: MDPI journal article supplement (doi:10.3390/insects14050485), 2023-05-22
Supplement: s1 [file s1]

Table S6. Codon usage of the 13 PCGs of the newly sequenced mitogenomes.

|        | <i>Sungaya<br/>inexpectata</i> |      | <i>Pulchriphyllium<br/>giganteum</i> |      | <i>pulchriphyllium<br/>bioculatum</i> |      | <i>Carausius</i> sp. |      | <i>Stheneboea<br/>repudiosa</i> |      | <i>Lopaphus<br/>sphalerus</i> |      | <i>Phraortes<br/>lianzhouensis</i> |      | <i>Marmessoidea<br/>bispinus</i> |      | <i>Lopaphus<br/>albopunctatus</i> |      |
|--------|--------------------------------|------|--------------------------------------|------|---------------------------------------|------|----------------------|------|---------------------------------|------|-------------------------------|------|------------------------------------|------|----------------------------------|------|-----------------------------------|------|
|        | Count                          | RSCU | Count                                | RSCU | Count                                 | RSCU | Count                | RSCU | Count                           | RSCU | Count                         | RSCU | Count                              | RSCU | Count                            | RSCU | Count                             | RSCU |
| UUU(F) | 293                            | 1.61 | 307                                  | 1.66 | 299                                   | 1.66 | 253                  | 1.63 | 296                             | 1.71 | 327                           | 1.77 | 300                                | 1.73 | 264                              | 1.6  | 320                               | 1.84 |
| UUC(F) | 70                             | 0.39 | 62                                   | 0.34 | 61                                    | 0.34 | 58                   | 0.37 | 50                              | 0.29 | 43                            | 0.23 | 47                                 | 0.27 | 66                               | 0.4  | 28                                | 0.16 |
| UUA(L) | 270                            | 3.58 | 264                                  | 3.36 | 267                                   | 3.58 | 338                  | 4.13 | 357                             | 4.42 | 316                           | 4.19 | 346                                | 4.42 | 326                              | 4.01 | 407                               | 5.02 |
| UUG(L) | 53                             | 0.7  | 63                                   | 0.8  | 59                                    | 0.79 | 45                   | 0.55 | 45                              | 0.56 | 57                            | 0.75 | 39                                 | 0.5  | 37                               | 0.45 | 17                                | 0.21 |
| CUU(L) | 47                             | 0.62 | 56                                   | 0.71 | 44                                    | 0.59 | 42                   | 0.51 | 24                              | 0.3  | 31                            | 0.41 | 35                                 | 0.45 | 42                               | 0.52 | 30                                | 0.37 |
| CUC(L) | 10                             | 0.13 | 5                                    | 0.06 | 5                                     | 0.07 | 2                    | 0.02 | 2                               | 0.02 | 1                             | 0.01 | 0                                  | 0    | 4                                | 0.05 | 0                                 | 0    |
| CUA(L) | 69                             | 0.91 | 74                                   | 0.94 | 69                                    | 0.92 | 59                   | 0.72 | 56                              | 0.69 | 45                            | 0.6  | 48                                 | 0.61 | 77                               | 0.95 | 32                                | 0.4  |
| CUG(L) | 4                              | 0.05 | 9                                    | 0.11 | 4                                     | 0.05 | 5                    | 0.06 | 1                               | 0.01 | 3                             | 0.04 | 2                                  | 0.03 | 2                                | 0.02 | 0                                 | 0    |
| AUU(I) | 285                            | 1.61 | 255                                  | 1.57 | 299                                   | 1.69 | 340                  | 1.76 | 341                             | 1.74 | 331                           | 1.8  | 337                                | 1.78 | 283                              | 1.62 | 350                               | 1.85 |
| AUC(I) | 70                             | 0.39 | 69                                   | 0.43 | 55                                    | 0.31 | 47                   | 0.24 | 52                              | 0.26 | 37                            | 0.2  | 42                                 | 0.22 | 66                               | 0.38 | 28                                | 0.15 |
| AUA(M) | 332                            | 1.79 | 336                                  | 1.71 | 362                                   | 1.81 | 358                  | 1.79 | 373                             | 1.9  | 396                           | 1.87 | 349                                | 1.86 | 359                              | 1.81 | 384                               | 1.91 |
| AUG(M) | 39                             | 0.21 | 57                                   | 0.29 | 39                                    | 0.19 | 42                   | 0.21 | 20                              | 0.1  | 27                            | 0.13 | 27                                 | 0.14 | 37                               | 0.19 | 19                                | 0.09 |
| GUU(V) | 87                             | 1.82 | 102                                  | 2.16 | 86                                    | 2.06 | 56                   | 1.44 | 70                              | 1.81 | 70                            | 1.79 | 81                                 | 1.78 | 77                               | 1.69 | 61                                | 1.56 |
| GUC(V) | 3                              | 0.06 | 7                                    | 0.15 | 8                                     | 0.19 | 5                    | 0.13 | 2                               | 0.05 | 4                             | 0.1  | 5                                  | 0.11 | 10                               | 0.22 | 2                                 | 0.05 |
| GUA(V) | 91                             | 1.91 | 71                                   | 1.5  | 67                                    | 1.6  | 86                   | 2.21 | 77                              | 1.99 | 78                            | 2    | 90                                 | 1.98 | 83                               | 1.82 | 89                                | 2.28 |
| GUG(V) | 10                             | 0.21 | 9                                    | 0.19 | 6                                     | 0.14 | 9                    | 0.23 | 6                               | 0.15 | 4                             | 0.1  | 6                                  | 0.13 | 12                               | 0.26 | 4                                 | 0.1  |
| UCU(S) | 95                             | 2.28 | 88                                   | 1.94 | 92                                    | 2.05 | 89                   | 2.18 | 100                             | 2.31 | 100                           | 2.33 | 96                                 | 2.3  | 101                              | 2.36 | 99                                | 2.45 |
| UCC(S) | 18                             | 0.43 | 18                                   | 0.4  | 15                                    | 0.33 | 13                   | 0.32 | 9                               | 0.21 | 12                            | 0.28 | 6                                  | 0.14 | 5                                | 0.12 | 7                                 | 0.17 |
| UCA(S) | 108                            | 2.59 | 127                                  | 2.81 | 121                                   | 2.7  | 118                  | 2.89 | 106                             | 2.45 | 115                           | 2.67 | 117                                | 2.8  | 101                              | 2.36 | 115                               | 2.85 |
| UCG(S) | 4                              | 0.1  | 4                                    | 0.09 | 5                                     | 0.11 | 3                    | 0.07 | 3                               | 0.07 | 1                             | 0.02 | 4                                  | 0.1  | 5                                | 0.12 | 0                                 | 0    |
| CCU(P) | 53                             | 1.61 | 40                                   | 1.21 | 47                                    | 1.4  | 67                   | 2.03 | 52                              | 1.6  | 49                            | 1.5  | 57                                 | 1.68 | 57                               | 1.77 | 56                                | 1.68 |
| CCC(P) | 16                             | 0.48 | 18                                   | 0.55 | 14                                    | 0.42 | 10                   | 0.3  | 7                               | 0.22 | 11                            | 0.34 | 10                                 | 0.29 | 12                               | 0.37 | 4                                 | 0.12 |
| CCA(P) | 59                             | 1.79 | 70                                   | 2.12 | 70                                    | 2.09 | 53                   | 1.61 | 68                              | 2.09 | 70                            | 2.14 | 68                                 | 2    | 58                               | 1.8  | 72                                | 2.17 |
| CCG(P) | 4                              | 0.12 | 4                                    | 0.12 | 3                                     | 0.09 | 2                    | 0.06 | 3                               | 0.09 | 1                             | 0.03 | 1                                  | 0.03 | 2                                | 0.06 | 1                                 | 0.03 |
| ACU(T) | 52                             | 0.91 | 57                                   | 1.07 | 49                                    | 0.92 | 70                   | 1.47 | 67                              | 1.31 | 64                            | 1.32 | 53                                 | 1.14 | 67                               | 1.34 | 63                                | 1.32 |
| ACC(T) | 29                             | 0.51 | 23                                   | 0.43 | 33                                    | 0.62 | 20                   | 0.42 | 16                              | 0.31 | 15                            | 0.31 | 15                                 | 0.32 | 18                               | 0.36 | 3                                 | 0.06 |
| ACA(T) | 142                            | 2.49 | 128                                  | 2.39 | 127                                   | 2.37 | 99                   | 2.07 | 122                             | 2.38 | 112                           | 2.31 | 113                                | 2.43 | 109                              | 2.18 | 125                               | 2.62 |
| ACG(T) | 5                              | 0.09 | 6                                    | 0.11 | 5                                     | 0.09 | 2                    | 0.04 | 0                               | 0    | 3                             | 0.06 | 5                                  | 0.11 | 6                                | 0.12 | 0                                 | 0    |
| GCU(A) | 44                             | 1.54 | 38                                   | 1.49 | 39                                    | 1.58 | 49                   | 1.75 | 44                              | 1.69 | 41                            | 1.41 | 53                                 | 1.83 | 53                               | 1.67 | 46                                | 1.7  |

|        |     |      |     |      |     |      |     |      |     |      |     |      |     |      |     |      |     |      |
|--------|-----|------|-----|------|-----|------|-----|------|-----|------|-----|------|-----|------|-----|------|-----|------|
| GCC(A) | 13  | 0.46 | 12  | 0.47 | 15  | 0.61 | 11  | 0.39 | 4   | 0.15 | 8   | 0.28 | 11  | 0.38 | 13  | 0.41 | 4   | 0.15 |
| GCA(A) | 52  | 1.82 | 49  | 1.92 | 43  | 1.74 | 50  | 1.79 | 56  | 2.15 | 66  | 2.28 | 50  | 1.72 | 56  | 1.76 | 57  | 2.11 |
| GCG(A) | 5   | 0.18 | 3   | 0.12 | 2   | 0.08 | 2   | 0.07 | 0   | 0    | 1   | 0.03 | 2   | 0.07 | 5   | 0.16 | 1   | 0.04 |
| UAU(Y) | 140 | 1.64 | 126 | 1.57 | 148 | 1.68 | 167 | 1.87 | 155 | 1.79 | 150 | 1.8  | 165 | 1.83 | 151 | 1.64 | 170 | 1.9  |
| UAC(Y) | 31  | 0.36 | 34  | 0.42 | 28  | 0.32 | 12  | 0.13 | 18  | 0.21 | 17  | 0.2  | 15  | 0.17 | 33  | 0.36 | 9   | 0.1  |
| CAU(H) | 42  | 1.27 | 36  | 1.16 | 40  | 1.27 | 53  | 1.54 | 43  | 1.39 | 47  | 1.45 | 50  | 1.54 | 44  | 1.28 | 59  | 1.79 |
| CAC(H) | 24  | 0.73 | 26  | 0.84 | 23  | 0.73 | 16  | 0.46 | 19  | 0.61 | 18  | 0.55 | 15  | 0.46 | 25  | 0.72 | 7   | 0.21 |
| CAA(Q) | 54  | 1.66 | 55  | 1.64 | 50  | 1.59 | 53  | 1.74 | 58  | 1.9  | 56  | 1.75 | 57  | 1.78 | 51  | 1.73 | 57  | 1.9  |
| CAG(Q) | 11  | 0.34 | 12  | 0.36 | 13  | 0.41 | 8   | 0.26 | 3   | 0.1  | 8   | 0.25 | 7   | 0.22 | 8   | 0.27 | 3   | 0.1  |
| AAU(N) | 141 | 1.51 | 134 | 1.43 | 138 | 1.45 | 175 | 1.76 | 173 | 1.75 | 192 | 1.81 | 158 | 1.71 | 141 | 1.56 | 195 | 1.84 |
| AAC(N) | 46  | 0.49 | 53  | 0.57 | 52  | 0.55 | 24  | 0.24 | 25  | 0.25 | 20  | 0.19 | 27  | 0.29 | 40  | 0.44 | 17  | 0.16 |
| AAA(K) | 86  | 1.7  | 96  | 1.64 | 103 | 1.72 | 104 | 1.79 | 98  | 1.78 | 95  | 1.76 | 108 | 1.79 | 98  | 1.73 | 104 | 1.82 |
| AAG(K) | 15  | 0.3  | 21  | 0.36 | 17  | 0.28 | 12  | 0.21 | 12  | 0.22 | 13  | 0.24 | 13  | 0.21 | 15  | 0.27 | 10  | 0.18 |
| GAU(D) | 54  | 1.54 | 54  | 1.61 | 51  | 1.55 | 65  | 1.71 | 60  | 1.67 | 54  | 1.61 | 65  | 1.76 | 58  | 1.59 | 67  | 1.86 |
| GAC(D) | 16  | 0.46 | 13  | 0.39 | 15  | 0.45 | 11  | 0.29 | 12  | 0.33 | 13  | 0.39 | 9   | 0.24 | 15  | 0.41 | 5   | 0.14 |
| GAA(E) | 69  | 1.73 | 57  | 1.61 | 58  | 1.66 | 62  | 1.85 | 64  | 1.75 | 67  | 1.74 | 66  | 1.78 | 54  | 1.4  | 75  | 1.92 |
| GAG(E) | 11  | 0.28 | 14  | 0.39 | 12  | 0.34 | 5   | 0.15 | 9   | 0.25 | 10  | 0.26 | 8   | 0.22 | 23  | 0.6  | 3   | 0.08 |
| UGU(C) | 40  | 1.82 | 45  | 1.73 | 53  | 1.86 | 39  | 1.86 | 41  | 1.95 | 43  | 1.91 | 44  | 1.83 | 41  | 1.78 | 42  | 1.95 |
| UGC(C) | 4   | 0.18 | 7   | 0.27 | 4   | 0.14 | 3   | 0.14 | 1   | 0.05 | 2   | 0.09 | 4   | 0.17 | 5   | 0.22 | 1   | 0.05 |
| UGA(W) | 82  | 1.71 | 71  | 1.54 | 75  | 1.63 | 89  | 1.82 | 81  | 1.78 | 83  | 1.77 | 83  | 1.78 | 79  | 1.66 | 90  | 1.91 |
| UGG(W) | 14  | 0.29 | 21  | 0.46 | 17  | 0.37 | 9   | 0.18 | 10  | 0.22 | 11  | 0.23 | 10  | 0.22 | 16  | 0.34 | 4   | 0.09 |
| CGU(R) | 14  | 1.06 | 14  | 1.14 | 13  | 1.06 | 19  | 1.46 | 19  | 1.49 | 20  | 1.54 | 20  | 1.54 | 15  | 1.13 | 15  | 1.13 |
| CGC(R) | 0   | 0    | 0   | 0    | 2   | 0.16 | 2   | 0.15 | 1   | 0.08 | 1   | 0.08 | 3   | 0.23 | 2   | 0.15 | 0   | 0    |
| CGA(R) | 32  | 2.42 | 30  | 2.45 | 30  | 2.45 | 26  | 2    | 27  | 2.12 | 30  | 2.31 | 29  | 2.23 | 30  | 2.26 | 36  | 2.72 |
| CGG(R) | 7   | 0.53 | 5   | 0.41 | 4   | 0.33 | 5   | 0.38 | 4   | 0.31 | 1   | 0.08 | 0   | 0    | 6   | 0.45 | 2   | 0.15 |
| AGU(S) | 29  | 0.69 | 33  | 0.73 | 34  | 0.76 | 30  | 0.73 | 34  | 0.79 | 39  | 0.91 | 39  | 0.93 | 38  | 0.89 | 28  | 0.69 |
| AGC(S) | 3   | 0.07 | 4   | 0.09 | 5   | 0.11 | 4   | 0.1  | 4   | 0.09 | 1   | 0.02 | 1   | 0.02 | 7   | 0.16 | 3   | 0.07 |
| AGA(S) | 71  | 1.7  | 82  | 1.81 | 79  | 1.76 | 65  | 1.59 | 82  | 1.9  | 70  | 1.63 | 69  | 1.65 | 84  | 1.96 | 69  | 1.71 |
| AGG(S) | 6   | 0.14 | 6   | 0.13 | 8   | 0.18 | 5   | 0.12 | 8   | 0.18 | 6   | 0.14 | 2   | 0.05 | 1   | 0.02 | 2   | 0.05 |
| GGU(G) | 73  | 1.4  | 72  | 1.43 | 67  | 1.38 | 75  | 1.53 | 83  | 1.76 | 76  | 1.58 | 82  | 1.64 | 57  | 1.19 | 87  | 1.76 |
| GGC(G) | 14  | 0.27 | 11  | 0.22 | 9   | 0.19 | 4   | 0.08 | 4   | 0.08 | 4   | 0.08 | 2   | 0.04 | 8   | 0.17 | 1   | 0.02 |
| GGA(G) | 74  | 1.42 | 85  | 1.69 | 78  | 1.61 | 97  | 1.98 | 86  | 1.82 | 87  | 1.8  | 90  | 1.8  | 92  | 1.92 | 93  | 1.88 |
| GGG(G) | 48  | 0.92 | 33  | 0.66 | 40  | 0.82 | 20  | 0.41 | 16  | 0.34 | 26  | 0.54 | 26  | 0.52 | 35  | 0.73 | 17  | 0.34 |
