# Supplementary material for: Nine Mitochondrial Genomes of Phasmatodea with Two Novel Mitochondrial Gene Rearrangements and Phylogeny
Source: MDPI journal article supplement (doi:10.3390/insects14050485), 2023-05-22
Supplement: s1 [file s1]

Table S5. Base composition of 13 PCGs in sequenced mitogenomes.

| Species                           | Gene    | ATP6   | ATP8   | COX1   | COX2   | COX3   | Cytb   | ND1    | ND2    | ND3    | ND4    | ND4L   | ND5    | ND6    |
|-----------------------------------|---------|--------|--------|--------|--------|--------|--------|--------|--------|--------|--------|--------|--------|--------|
|                                   | Strand  | +      | +      | +      | +      | +      | +      | -      | +      | +      | -      | -      | -      | +      |
| <i>Sungaya inexpectata</i>        | length  | 675    | 156    | 1534   | 670    | 786    | 1134   | 969    | 1014   | 354    | 1311   | 285    | 1724   | 483    |
|                                   | A+T%    | 74.6   | 83.3   | 67.5   | 70.7   | 69.5   | 69     | 76.6   | 78.5   | 71.8   | 75.6   | 78.3   | 76     | 78.7   |
|                                   | AT-Skew | 0.123  | 0.277  | 0.035  | 0.143  | 0.077  | 0.098  | -0.456 | 0.214  | 0.142  | -0.407 | -0.48  | -0.391 | 0.189  |
|                                   | GC-Skew | -0.24  | -0.385 | -0.09  | -0.184 | -0.1   | -0.179 | 0.321  | -0.321 | -0.32  | 0.21   | 0.258  | 0.278  | -0.476 |
| <i>Pulchriphyllium bioculatum</i> | length  | 675    | 153    | 1534   | 652    | 783    | 1125   | 966    | 996    | 352    | 1330   | 285    | 1722   | 483    |
|                                   | A+T%    | 75.7   | 84.9   | 68.4   | 72.4   | 71.1   | 71.7   | 75.9   | 78.2   | 75.9   | 76.4   | 81.4   | 76.9   | 78.3   |
|                                   | AT-Skew | 0.166  | 0.246  | 0.065  | 0.191  | 0.131  | 0.152  | -0.457 | 0.168  | 0.101  | -0.459 | -0.431 | -0.407 | 0.254  |
|                                   | GC-Skew | -0.293 | -0.739 | -0.117 | -0.189 | -0.124 | -0.283 | 0.33   | -0.309 | -0.365 | 0.255  | 0.283  | 0.333  | -0.371 |
| <i>Pulchriphyllium giganteum</i>  | length  | 672    | 153    | 1534   | 667    | 783    | 1125   | 966    | 999    | 352    | 1330   | 285    | 1719   | 486    |
|                                   | A+T%    | 74.8   | 83     | 67.9   | 71.8   | 70.6   | 69.9   | 75.5   | 76.6   | 71.8   | 75.1   | 79     | 76.4   | 78.2   |
|                                   | AT-Skew | 0.141  | 0.307  | 0.068  | 0.215  | 0.125  | 0.13   | -0.496 | 0.18   | 0.123  | -0.459 | -0.467 | -0.412 | 0.247  |
|                                   | GC-Skew | -0.243 | -0.077 | -0.073 | -0.138 | -0.078 | -0.257 | 0.297  | -0.305 | -0.273 | 0.19   | 0.433  | 0.283  | -0.472 |
| <i>Carausius</i> sp.              | length  | 666    | 156    | 1534   | 670    | 783    | 1134   | 966    | 987    | 351    | 1332   | 285    | 1721   | 471    |
|                                   | A+T%    | 77.4   | 82.7   | 70.3   | 74.5   | 71.2   | 74.9   | 77.8   | 82.2   | 78.4   | 77.2   | 80.1   | 77.6   | 84.1   |
|                                   | AT-Skew | 0.062  | 0.163  | -0.006 | 0.106  | 0.045  | -0.02  | -0.358 | 0.132  | 0.069  | -0.331 | -0.339 | -0.268 | 0.152  |
|                                   | GC-Skew | -0.267 | -0.407 | -0.081 | -0.17  | -0.186 | -0.123 | 0.278  | -0.216 | -0.368 | 0.287  | 0.276  | 0.214  | -0.413 |
| <i>Stheneboea repudiosa</i>       | length  | 672    | 156    | 1534   | 669    | 789    | 1134   | 960    | 990    | 354    | 1327   | 288    | 1723   | 477    |
|                                   | A+T%    | 79.3   | 87.2   | 71.5   | 75.4   | 73     | 74.1   | 78.8   | 81.9   | 78     | 79.2   | 81.8   | 78.7   | 82.6   |
|                                   | AT-Skew | 0.107  | 0.265  | 0.027  | 0.087  | 0.045  | 0.12   | -0.416 | 0.154  | 0.123  | -0.396 | -0.387 | -0.337 | 0.188  |
|                                   | GC-Skew | -0.281 | -0.5   | -0.075 | -0.139 | -0.127 | -0.235 | 0.303  | -0.229 | -0.333 | 0.302  | 0.396  | 0.272  | -0.373 |

|                                |         |        |        |        |        |        |        |        |        |        |        |        |        |        |
|--------------------------------|---------|--------|--------|--------|--------|--------|--------|--------|--------|--------|--------|--------|--------|--------|
| <i>Lopaphus sphaerus</i>       | length  | 675    | 159    | 1534   | 670    | 787    | 1134   | 966    | 1020   | 352    | 1332   | 291    | 1723   | 480    |
|                                | A+T%    | 76.9   | 88.1   | 71.4   | 72.8   | 73.6   | 73.8   | 77.9   | 82.1   | 77.2   | 78.7   | 81.8   | 79.7   | 82.4   |
|                                | AT-Skew | 0.11   | 0.214  | 0.048  | 0.184  | 0.054  | 0.111  | -0.431 | 0.123  | 0.14   | -0.407 | -0.487 | -0.353 | 0.121  |
|                                | GC-Skew | -0.179 | -0.368 | -0.032 | -0.143 | -0.087 | -0.152 | 0.262  | -0.169 | -0.3   | 0.279  | 0.358  | 0.211  | -0.262 |
| <i>Phraortes lianzhouensis</i> | length  | 675    | 159    | 1534   | 667    | 787    | 1131   | 964    | 993    | 354    | 1326   | 285    | 1724   | 471    |
|                                | A+T%    | 77.5   | 85.5   | 69.7   | 74.2   | 72.5   | 73     | 78.1   | 83.2   | 77.7   | 78.3   | 82.1   | 78.4   | 84.3   |
|                                | AT-Skew | 0.117  | 0.265  | -0.007 | 0.131  | 0.007  | 0.056  | -0.402 | 0.133  | 0.047  | -0.372 | -0.385 | -0.339 | 0.139  |
|                                | GC-Skew | -0.184 | -0.304 | -0.045 | -0.093 | -0.023 | -0.102 | 0.249  | -0.102 | -0.215 | 0.174  | 0.412  | 0.204  | -0.378 |
| <i>Marmessoidea bispinus</i>   | length  | 669    | 159    | 1534   | 670    | 789    | 1137   | 966    | 999    | 352    | 1332   | 291    | 1713   | 483    |
|                                | A+T%    | 75.7   | 81.1   | 67.9   | 70.3   | 69.2   | 71.3   | 76.7   | 78.9   | 76.4   | 77.2   | 79.4   | 77.3   | 82.2   |
|                                | AT-Skew | 0.091  | 0.225  | 0.051  | 0.151  | 0.07   | 0.091  | -0.406 | 0.153  | 0.063  | -0.366 | -0.368 | -0.311 | 0.123  |
|                                | GC-Skew | -0.288 | -0.133 | -0.077 | -0.146 | -0.086 | -0.174 | 0.2    | -0.171 | -0.277 | 0.171  | 0.4    | 0.285  | -0.326 |
| <i>Lopaphus albopunctatus</i>  | length  | 675    | 159    | 1534   | 670    | 789    | 1134   | 966    | 1014   | 352    | 1332   | 285    | 1725   | 474    |
|                                | A+T%    | 78.7   | 90.5   | 73.6   | 75.8   | 74.4   | 75.7   | 80.7   | 84     | 80.7   | 80.9   | 82.5   | 81     | 84.2   |
|                                | AT-Skew | 0.096  | 0.167  | 0.011  | 0.126  | 0.036  | 0.026  | -0.346 | 0.146  | 0.063  | -0.348 | -0.387 | -0.296 | 0.103  |
|                                | GC-Skew | -0.069 | -0.333 | 0.022  | -0.16  | 0      | -0.043 | 0.161  | -0.099 | -0.235 | 0.2    | 0.120  | 0.152  | -0.307 |

---
